# Supplementary material
Source: PubMed Central journal article supplement (PMC9018619)
Supplement: NIHMS1784481-supplement-1.pdf [file NIHMS1784481-supplement-1.pdf]

**Table S1.** List of genotypes used in this work.

| <b>Figure</b> | <b>Cells Imaged / Label</b>            | <b>Fly Genotype</b>                                                                                                                                      | <b>Notes</b>                       |
|---------------|----------------------------------------|----------------------------------------------------------------------------------------------------------------------------------------------------------|------------------------------------|
| Fig1B         | Astrocytes /<br>myr::tdTomato          | <i>pBPhsFLP2::PEST (attP3);</i><br><i>10X-UAS-myr::tdTOM (attP40) / +;</i><br><i>UAS-FSF-myr::smGdP-HA/V5/FLAG</i><br><i>(VK5) / R25H07-GAL4 (attP2)</i> | HA/V5/FLAG not<br>used in analysis |
| Fig1C         | Ensheathing<br>glia /<br>myr::tdTomato | <i>pBPhsFLP2::PEST (attP3);</i><br><i>10X-UAS-myr::tdTOM (attP40) / +;</i><br><i>UAS-FSF-myr::smGdP-HA/V5/FLAG</i><br><i>(VK5) / R56F03-GAL4 (attP2)</i> | HA/V5/FLAG not<br>used in analysis |
| Fig1D         | Cortex glia /<br>myr::tdTomato         | <i>pBPhsFLP2::PEST (attP3);</i><br><i>10X-UAS-myr::tdTOM (attP40) / +;</i><br><i>UAS-FSF-myr::smGdP-HA/V5/FLAG</i><br><i>(VK5) / R54H02-GAL4 (attP2)</i> | HA/V5/FLAG not<br>used in analysis |

|         |                                                    |                                                                                                                                                                                                                     |  |
|---------|----------------------------------------------------|---------------------------------------------------------------------------------------------------------------------------------------------------------------------------------------------------------------------|--|
| Fig1G,J | Astrocytes /<br>GCaMP,<br>Neurons /<br>RCaMP       | 20XUAS-IVS-Syn21-OpGCaMP6s-p10<br>(su(Hw)attP8)/w;<br><br>R57C10-lexA (attP40), 13XLexAop2-<br>IVS-NES-jRCaMP1b (VK00005) / alm-<br>Gal4.D.3;<br><br>20XUAS-IVS-Syn21-OpGCaMP6s-p10<br>(su(Hw)attP1) / alm-Gal4.D.2 |  |
| Fig1H,K | Ensheathing<br>glia / GCaMP,<br>Neurons /<br>RCaMP | 20XUAS-IVS-Syn21-OpGCaMP6s-p10<br>(su(Hw)attP8)/w;<br><br>R57C10-lexA (attP40), 13XLexAop2-<br>IVS-NES-jRCaMP1b (VK00005) / +;<br><br>20XUAS-IVS-Syn21-OpGCaMP6s-p10<br>(su(Hw)attP1) / R56F03-GAL4 (attP2)         |  |
| Fig1I,L | Cortex glia /<br>GCaMP,<br>Neurons /<br>RCaMP      | 20XUAS-IVS-Syn21-OpGCaMP6s-p10<br>(su(Hw)attP8)/w;<br><br>R57C10-lexA (attP40), 13XLexAop2-<br>IVS-NES-jRCaMP1b (VK00005) / +;<br><br>20XUAS-IVS-Syn21-OpGCaMP6s-p10<br>(su(Hw)attP1) / R54H02-GAL4 (attP2)         |  |
| Fig2B   | Cortex glia /<br>hid,<br>Neurons<br>/RCaMP         | w;<br><br>R57C10-LexA (attP40), 13X-LexAop2-<br>IVS-NES-jRCaMP1b-p10 (su(Hw)attP5)<br>/ UAS-Stinger, UAS-hidZ;<br><br>tubP-GAL80ts(2) / R54H02-GAL4                                                                 |  |

|             |                                                 |                                                                                                                                                                                                                           |  |
|-------------|-------------------------------------------------|---------------------------------------------------------------------------------------------------------------------------------------------------------------------------------------------------------------------------|--|
|             |                                                 | <i>(attP2)</i>                                                                                                                                                                                                            |  |
| Fig2C       | Ensheathing<br>glia / hid,<br>Neurons<br>/RCaMP | <i>w;</i><br><i>R57C10-LexA (attP40), 13X-LexAop2-</i><br><i>IVS-NES-jRCaMP1b-p10 (su(Hw)attP5)</i><br><i>/ UAS-Stinger, UAS-hidZ;</i><br><i>tubP-GAL80ts(2) / R56F03-GAL4</i><br><i>(attP2)</i>                          |  |
| Fig2D       | Astrocytes /<br>hid, Neurons<br>/RCaMP          | <i>w;</i><br><i>R57C10-LexA (attP40), 13X-LexAop2-</i><br><i>IVS-NES-jRCaMP1b-p10 (su(Hw)attP5)</i><br><i>/ UAS-Stinger, UAS-hidZ;</i><br><i>tubP-GAL80ts(2) / alrm-GAL4</i>                                              |  |
| Fig2E,F     | Astrocytes /<br>hid, Neurons<br>/RCaMP          | <i>w;</i><br><i>R57C10-LexA (attP40), 13X-LexAop2-</i><br><i>IVS-NES-jRCaMP1b-p10 (su(Hw)attP5)</i><br><i>/ UAS-Stinger, UAS-hidZ;</i><br><i>tubP-GAL80ts(2) / R25H07-GAL4</i><br><i>(attP2)</i>                          |  |
| Fig3B,E,F,G | Neurons /<br>GCaMP                              | <i>yw, UAS-Kir2.1-2A-myr::tdTOM-3xHA</i><br><i>(attP3) / w;</i><br><i>tubP-GAL80ts(10) / +;</i><br><i>R57C10-lexAp65 (VK20), lexAop2-</i><br><i>opGCaMP6s (su(Hw)attP1), UAS-</i><br><i>his::RFP / empty-GAL4 (attP2)</i> |  |
| Fig3B,E,F,G | Neurons /                                       | <i>yw, UAS-Kir2.1-2A-myr::tdTOM-3xHA</i>                                                                                                                                                                                  |  |

|             |                                                 |                                                                                                                                                                                                                     |  |
|-------------|-------------------------------------------------|---------------------------------------------------------------------------------------------------------------------------------------------------------------------------------------------------------------------|--|
|             | Kir2.1,<br>Neurons /<br>GCaMP                   | <i>(attP3) / w;</i><br><i>tubP-GAL80ts(10) / +;</i><br><i>R57C10-lexAp65 (VK20), lexAop2-</i><br><i>opGCaMP6s (su(Hw)attP1), UAS-</i><br><i>his::RFP / R57C10-GAL4 (attP2)</i>                                      |  |
| Fig3B,E,F,G | Trpy Neurons<br>/ Kir2.1,<br>Neurons /<br>GCaMP | <i>yw, UAS-Kir2.1-2A-myr::tdTOM-3xHA</i><br><i>(attP3) / w;</i><br><i>tubP-GAL80ts(10) / TI-Trpy-GAL4;</i><br><i>R57C10-lexAp65 (VK20), lexAop2-</i><br><i>opGCaMP6s (su(Hw)attP1), UAS-</i><br><i>his::RFP / +</i> |  |
| Fig3B       | Neurons /<br>GCaMP                              | <i>w, UAS-TeTxLC (C1) / w;</i><br><i>tubP-GAL80ts(10) / +;</i><br><i>R57C10-lexAp65 (VK20), lexAop2-</i><br><i>opGCaMP6s (su(Hw)attP1), UAS-</i><br><i>his::RFP / empty-GAL4 (attp2)</i>                            |  |
| Fig3B       | Neurons /<br>TNT,<br>Neurons /<br>GCaMP         | <i>w, UAS-TeTxLC (C1) / w;</i><br><i>tubP-GAL80ts(10) / +;</i><br><i>R57C10-lexAp65 (VK20), lexAop2-</i><br><i>opGCaMP6s (su(Hw)attP1), UAS-</i><br><i>his::RFP / R57C10-GAL4 (attP2)</i>                           |  |
| Fig3C,D     | Astrocytes /<br>GCaMP                           | <i>w, UAS-TeTxLC (C1) / w;</i><br><i>tubP-GAL80ts(10) / R25H07-lexAp65</i><br><i>(attP40), lexAop2-opGCaMP6s</i><br><i>(su(Hw)attP5);</i><br><i>lexAop2-opGCaMP6s (su(Hw)attP1) /</i>                               |  |

|           |                                                 |                                                                                                                                                                                                             |  |
|-----------|-------------------------------------------------|-------------------------------------------------------------------------------------------------------------------------------------------------------------------------------------------------------------|--|
|           |                                                 | <i>empty-GAL4 (attP2)</i>                                                                                                                                                                                   |  |
| Fig3C,D   | Neurons /<br>Kir2.1,<br>Astrocytes /<br>GCaMP   | <i>w, UAS-Kir2.1-2A-myr::tdTOM-3xHA (attP3) / w;</i><br><i>tubP-GAL80ts(10) / R25H07-lexAp65 (attP40), lexAop2-opGCaMP6s (su(Hw)attP5);</i><br><i>lexAop2-opGCaMP6s (su(Hw)attP1) / R57C10-GAL4 (attP2)</i> |  |
| Fig3C,D   | Neurons /<br>TNT,<br>Astrocytes /<br>GCaMP      | <i>w, UAS-TeTxLC (C1) / w;</i><br><i>tubP-GAL80ts(10) / R25H07-lexAp65 (attP40), lexAop2-opGCaMP6s (su(Hw)attP5);</i><br><i>lexAop2-opGCaMP6s (su(Hw)attP1) / R57C10-GAL4 (attP2)</i>                       |  |
| Fig4B,C   | Astrocytes /<br>GCaMP                           | <i>w;</i><br><i>R25H07-lexAp65 (attP40), lexAop2-opGCaMP6s (su(Hw)attP5);</i><br><i>R25H07-GAL4 (attP2) / +</i>                                                                                             |  |
| Fig4B,C,D | Astrocytes /<br>TrpA1,<br>Astrocytes /<br>GCaMP | <i>w;</i><br><i>R25H07-lexAp65 (attP40), lexAop2-opGCaMP6s (su(Hw)attP5);</i><br><i>R25H07-GAL4 (attP2) / UAS-TrpA1 (attP2)</i>                                                                             |  |
| Fig4D     | Astrocytes /<br>GCaMP                           | <i>w;</i><br><i>R25H07-lexAp65 (attP40), lexAop2-</i>                                                                                                                                                       |  |

|         |                                              |                                                                                                                                                      |  |
|---------|----------------------------------------------|------------------------------------------------------------------------------------------------------------------------------------------------------|--|
|         |                                              | <i>opGCaMP6s (su(Hw)attP5);</i><br><i>empty-GAL4 (attP2) / UAS-TrpA1</i><br><i>(attP2)</i>                                                           |  |
| Fig4B,C | Neurons /<br>GCaMP                           | <i>w;</i><br><i>R57C10-lexAp65 (attP40), lexAop2-</i><br><i>opGCaMP6s (su(Hw)attP5);</i><br><i>R25H07-GAL4 (attP2) / +</i>                           |  |
| Fig4B,C | Astrocytes /<br>TrpA1,<br>Neurons /<br>GCaMP | <i>w;</i><br><i>R57C10-lexAp65 (attP40), lexAop2-</i><br><i>opGCaMP6s (su(Hw)attP5);</i><br><i>UAS-TrpA1 (attP2) / R25H07-GAL4</i><br><i>(attP2)</i> |  |
| Fig4E   | Neurons /<br>Control                         | <i>w;</i><br><i>R57C10-lexAp65 (attP40), lexAop2-</i><br><i>opGCaMP6s (su(Hw)attP5);</i><br><i>wtrw<sup>ex</sup> / +</i>                             |  |
| Fig4E   | Neurons /<br><i>wtrw</i>                     | <i>w;</i><br><i>R57C10-lexAp65 (attP40), lexAop2-</i><br><i>opGCaMP6s (su(Hw)attP5);</i><br><i>wtrw<sup>ex</sup> / wtrw<sup>ex</sup></i>             |  |
